# Supplementary material
Source: PubMed Central journal article supplement (PMC5396539)

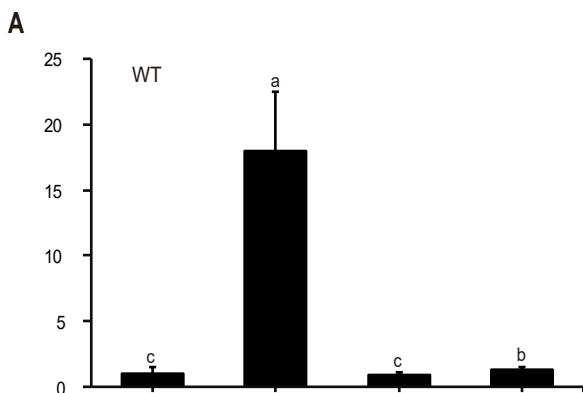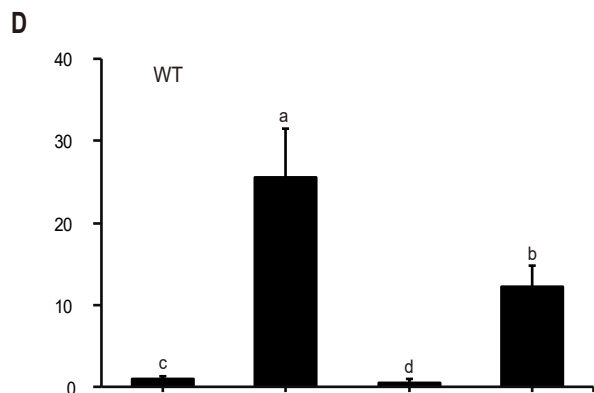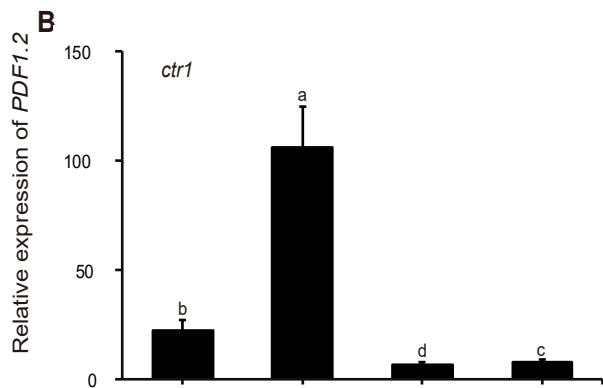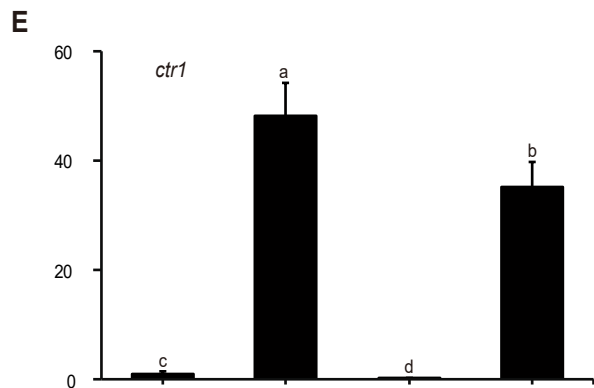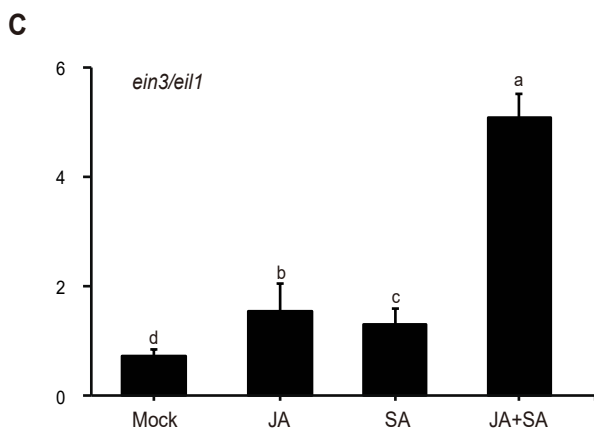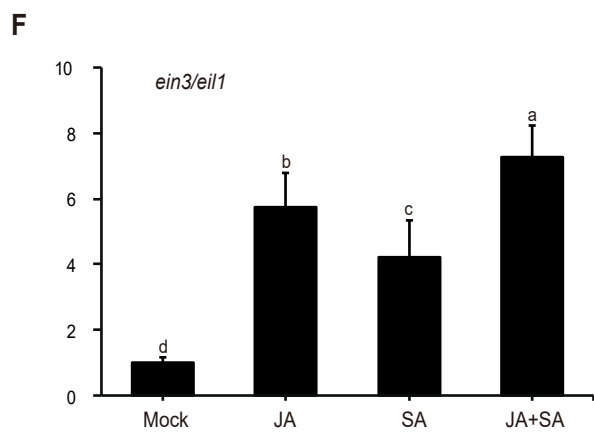

Supplement: NIHMS851353-supplement-Supp_Fig_S1.pdf [file NIHMS851353-supplement-Supp_Fig_S1.pdf]

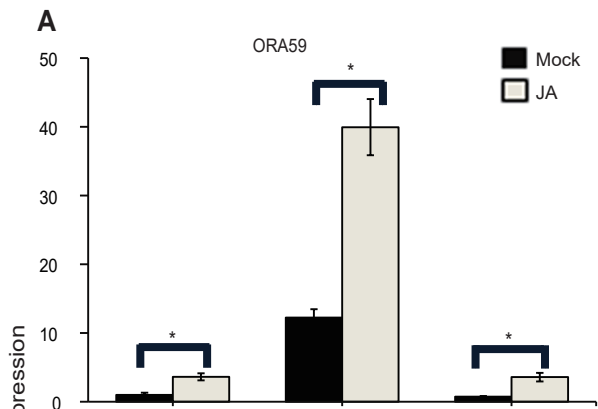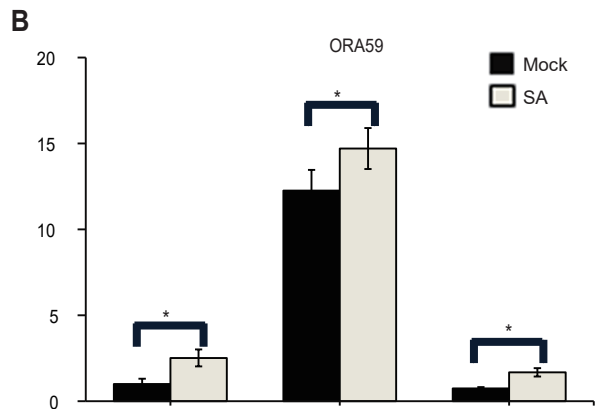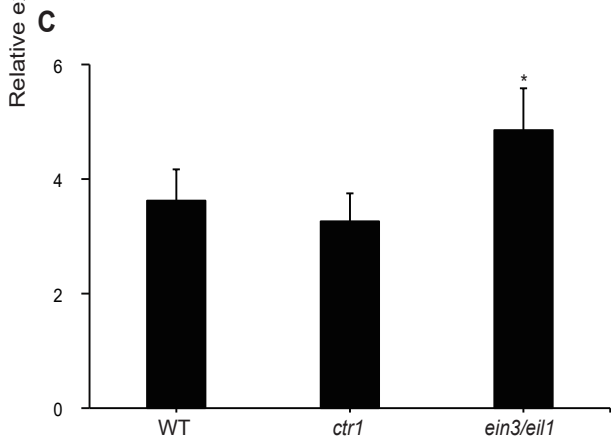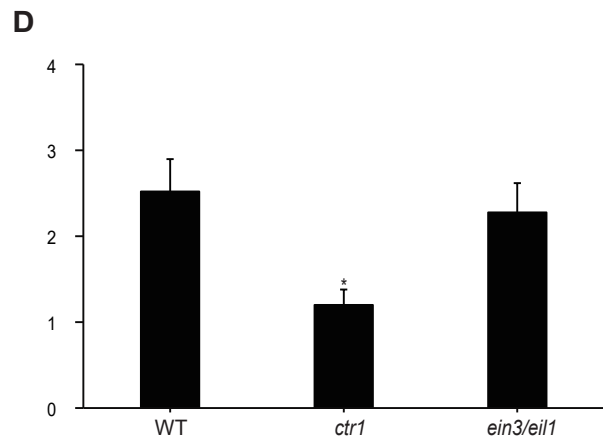

Supplement: NIHMS851353-supplement-Supp_Fig_S2.pdf [file NIHMS851353-supplement-Supp_Fig_S2.pdf]

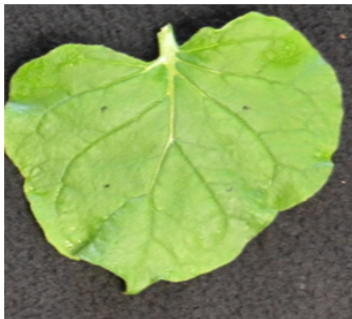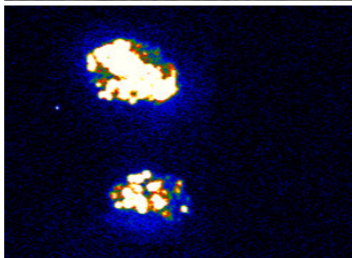

35S:LUC

35S:EIN3:LUC-C  
+  
35S:ERF1:LUC-N

Supplement: NIHMS851353-supplement-Supp_Fig_S3.pdf [file NIHMS851353-supplement-Supp_Fig_S3.pdf]
